# Supplementary material for: 5-aminosalicylic acid improves lipid profile in mice fed a high-fat cholesterol diet through its dual effects on intestinal PPARγ and PPARα
Source: PLOS journal article supplement (doi:10.1371/journal.pone.0191485), 2018-01-19
Supplement: S1 (10.1371/journal.pone.0191485.s001) [file journal.pone.0191485.s001]

**Supplementary Table 1**

Primer sequences used for qPCR.

| **Gene** | **Forward primers (5'-3')** | **Reverse primers (5'-3')** |
| --- | --- | --- |
| ABCG5 | CTGCATGTGTCCTACAGCGTCA | AGATGCACATAATCTGGCCACTCTC |
| ABCG8 | TCAGTCCAACACTCTGGAGGTCA | ATTTCGGATGCCCAGCTCAC |
| ACO | GTGCAGCTCAGAGTCTGTCCAA | TACTGCTGCGTCTGAAAATCCA |
| AOX | GCCACGGAACTCATCTTCGA | GATCACCATTAAATCTGAAAGTACC |
| CD36 | GATCGGAACTGTGGGCTCAT | GGTTCCTTCTTCAAGGACAACTTC |
| CPT1α | CATGTCAAGCCAGACGAAGA | TGGTAGGAGAGCAGCACCTT |
| Desnutrin | AGCATCTGCCAGTATCTGGTGAT | GGTGCCCTGACAGAGCAGAT |
| FATP-4 | CCAGACAAGGGTTTTACAGATAAGCT | ACCTGCTGTGCACCACAATG |
| HSL | GAGGCCTTTGAGATGCCACT | CCCCAACTATCACCAGACTTCG |
| IL-6 | CTGCAAGAGACTTCCATCCAGTT | AGGGAAGGCCGTGGTTGT |
| L-FABP | CCATGAACTTCTCCGGCAAGT | TCCTTCCCTTTCTGGATGAGGT |
| MCAD | GCTAGTGGAGCACCAAGGAG | CCAGGCTGCTCTCTGGTAAC |
| MCP1 | GCTGGAGAGCTACAAGAGGATCA | ACAGACCTCTCTCTTGAGCTTGGT |
| Mrc1 | TTTGGAATCAAGGGCACAGAG | TGCTCCACAATCCCGAACC |
| NPC1L1 | GAGAGCCAAAGATGCTACTATCTTCA | CCCGGGAAGTTGGTCATG |
| PPARα | TTCCCTGTTTGTGGCTGCTAT | TGCAACTTCTCAATGTAGCCTATGTT |
| PPARγ | GCCCTTTGGTGACTTTATGG | CTCGATGGGCTTCACGTT |
| PPIA | TTCCTCCTTTCACAGAATTATTCCA | CCGCCAGTGCCATTATGG |
| Ym1 | AGAAGGGAGTTTCAAACCTGGT | GTCTTGCTCATGTGTGTAAGTGA |
| ZO-1 | GCCGCTAAGAGCACAGCAA | TCCCCACTCTGAAAATGAGGA |
